# Supplementary material
Source: PubMed Central journal article supplement (PMC10991957)
Supplement: 262_2021_3035_MOESM1_ESM.pdf [file 262_2021_3035_MOESM1_ESM.pdf]

Supplementary Table S1. Best response to fluoropyrimidine–platinum doublet plus trastuzumab according to baseline NK cell activity among patients with measurable disease (n=29)

|                       | <b>Low baseline NK cell activity<br/>(n=14)</b> | <b>High baseline NK cell activity<br/>(n=15)</b> | <b>P value</b> |
|-----------------------|-------------------------------------------------|--------------------------------------------------|----------------|
| Best response         |                                                 |                                                  | >0.999         |
| CR                    | 0 (0.0%)                                        | 0 (0.0%)                                         |                |
| PR                    | 12 (85.7%)                                      | 13 (86.7%)                                       |                |
| SD                    | 2 (14.3%)                                       | 2 (13.3%)                                        |                |
| PD                    | 0 (0.0%)                                        | 0 (0.0%)                                         |                |
| Overall response rate | 12 (85.7%)                                      | 13 (86.7%)                                       | > 0.999        |

Abbreviations: NK = natural killer, CR = complete response, PR = partial response, SD = stable disease, PD = progressive disease

Supplementary Table S2. Baseline characteristics of patients according to dynamic changes in NK cell activity

|                          | High baseline NK group<br>(n=19) | Recovered NK group<br>(n=9) | Persistently low NK group<br>(n=10) | P value |
|--------------------------|----------------------------------|-----------------------------|-------------------------------------|---------|
| Age (mean±SD)            | 63.47±9.03                       | 62.56±10.62                 | 62.20±8.24                          | 0.931   |
| Sex                      |                                  |                             |                                     | 0.015   |
| Female                   | 2 (10.5%)                        | 5 (55.6%)                   | 1 (10.0%)                           |         |
| Male                     | 17 (89.5%)                       | 4 (44.4%)                   | 9 (90.0%)                           |         |
| HER2 status              |                                  |                             |                                     | 0.222   |
| IHC 2+ / FISH+           | 3 (15.8%)                        | 1 (11.1%)                   | 4 (40.0%)                           |         |
| IHC 3+                   | 16 (84.2%)                       | 8 (88.9%)                   | 6 (60.0%)                           |         |
| Risk group               |                                  |                             |                                     | 0.033   |
| Good                     | 9 (47.4%)                        | 3 (33.3%)                   | 0 (0.0%)                            |         |
| Moderate or poor         | 10 (52.6%)                       | 6 (66.7%)                   | 10 (100.0%)                         |         |
| ECOG PS                  |                                  |                             |                                     | 0.831   |
| 0–1                      | 18 (94.7%)                       | 8 (88.9%)                   | 9 (90.0%)                           |         |
| ≥ 2                      | 1 (5.3%)                         | 1 (11.1%)                   | 1 (10.0%)                           |         |
| Prior gastrectomy        |                                  |                             |                                     | 0.121   |
| No                       | 9 (47.4%)                        | 4 (44.4%)                   | 1 (10.0%)                           |         |
| Yes                      | 10 (52.6%)                       | 5 (55.6%)                   | 9 (90.0%)                           |         |
| Peritoneal metastasis    |                                  |                             |                                     | 0.149   |
| No                       | 11 (57.9%)                       | 4 (44.4%)                   | 2 (20.0%)                           |         |
| Yes                      | 8 (42.1%)                        | 5 (55.6%)                   | 8 (80.0%)                           |         |
| Bone metastasis          |                                  |                             |                                     | 0.831   |
| No                       | 18 (94.7%)                       | 8 (88.9%)                   | 9 (90.0%)                           |         |
| Yes                      | 1 (5.3%)                         | 1 (11.1%)                   | 1 (10.0%)                           |         |
| Lung metastasis          |                                  |                             |                                     | 0.831   |
| No                       | 18 (94.7%)                       | 8 (88.9%)                   | 9 (90.0%)                           |         |
| Yes                      | 1 (5.3%)                         | 1 (11.1%)                   | 1 (10.0%)                           |         |
| Elevated ALP             |                                  |                             |                                     | 0.932   |
| No                       | 12 (63.2%)                       | 6 (66.7%)                   | 7 (70.0%)                           |         |
| Yes                      | 7 (36.8%)                        | 3 (33.3%)                   | 3 (30.0%)                           |         |
| Elevated total bilirubin |                                  |                             |                                     | 0.052   |

|                   |                   |                   |                   |       |
|-------------------|-------------------|-------------------|-------------------|-------|
| No                | 19 (100.0%)       | 9 (100.0%)        | 8 (80.0%)         |       |
| Yes               | 0 (0.0%)          | 0 (0.0%)          | 2 (20.0%)         |       |
| Hypoalbuminemia   |                   |                   |                   |       |
| No                | 15 (78.9%)        | 7 (77.8%)         | 5 (50.0%)         |       |
| Yes               | 4 (21.1%)         | 2 (22.2%)         | 5 (50.0%)         |       |
| NLR, median (IQR) | 1.92 (1.50, 2.40) | 3.06 (2.18, 4.94) | 2.92 (2.42, 3.69) | 0.053 |

Abbreviations: NK cell = natural killer cell, SD = standard deviation, IHC = immunohistochemistry, FISH = fluorescence in situ hybridization, ECOG PS = Eastern Cooperative Oncology Group Performance Status, ALP = alkaline phosphatase, NLR = neutrophil to lymphocyte ratio, IQR = interquartile range, FISH = fluorescence in situ hybridization

Supplementary Table S3. Best response to fluoropyrimidine-platinum doublet plus trastuzumab according to dynamic change in NK cell activity in patients with measurable disease (n = 29)

|                       | <b>High baseline NK group<br/>(n = 14)</b> | <b>Recovered NK group<br/>(n = 8)</b> | <b>Persistently low NK group<br/>(n = 7)</b> | <b>P-value</b> |
|-----------------------|--------------------------------------------|---------------------------------------|----------------------------------------------|----------------|
| Best response         |                                            |                                       |                                              | >0.999         |
| CR                    | 0 (0.0%)                                   | 0 (0.0%)                              | 0 (0.0%)                                     |                |
| PR                    | 12 (85.7%)                                 | 7 (87.5%)                             | 6 (85.7%)                                    |                |
| SD                    | 2 (14.3%)                                  | 1 (12.5%)                             | 1 (14.3%)                                    |                |
| PD                    | 0 (0.0%)                                   | 0 (0.0%)                              | 0 (0.0%)                                     |                |
| Overall response rate | 12 (85.7%)                                 | 7 (87.5%)                             | 6 (85.7%)                                    | >0.999         |

Abbreviations: NK cell = natural killer cell, CR = complete response, PR = partial response, SD = stable disease, PD = progressive disease
